# Supplementary material for: Improving stability of frying oils and food quality with addition of dried olive mill wastewater
Source: Springer Nature journal article supplement (doi:10.1038/s41538-025-00430-x), 2025-05-16
Supplement: MOESM1 [file 41538_2025_430_MOESM1_ESM.pdf]

### Supplementary information

Supplementary data include: stages for extracted oil and by-products of olive fruit, polyphenolic composition of olive mill waste water dried by using HPLC, HPLC chromatograph of tocopherol vitamin (E) and A vitamin in OMWW, and photograph image of mayonnaise prepared supplemented with different percentages of dried OMWW.

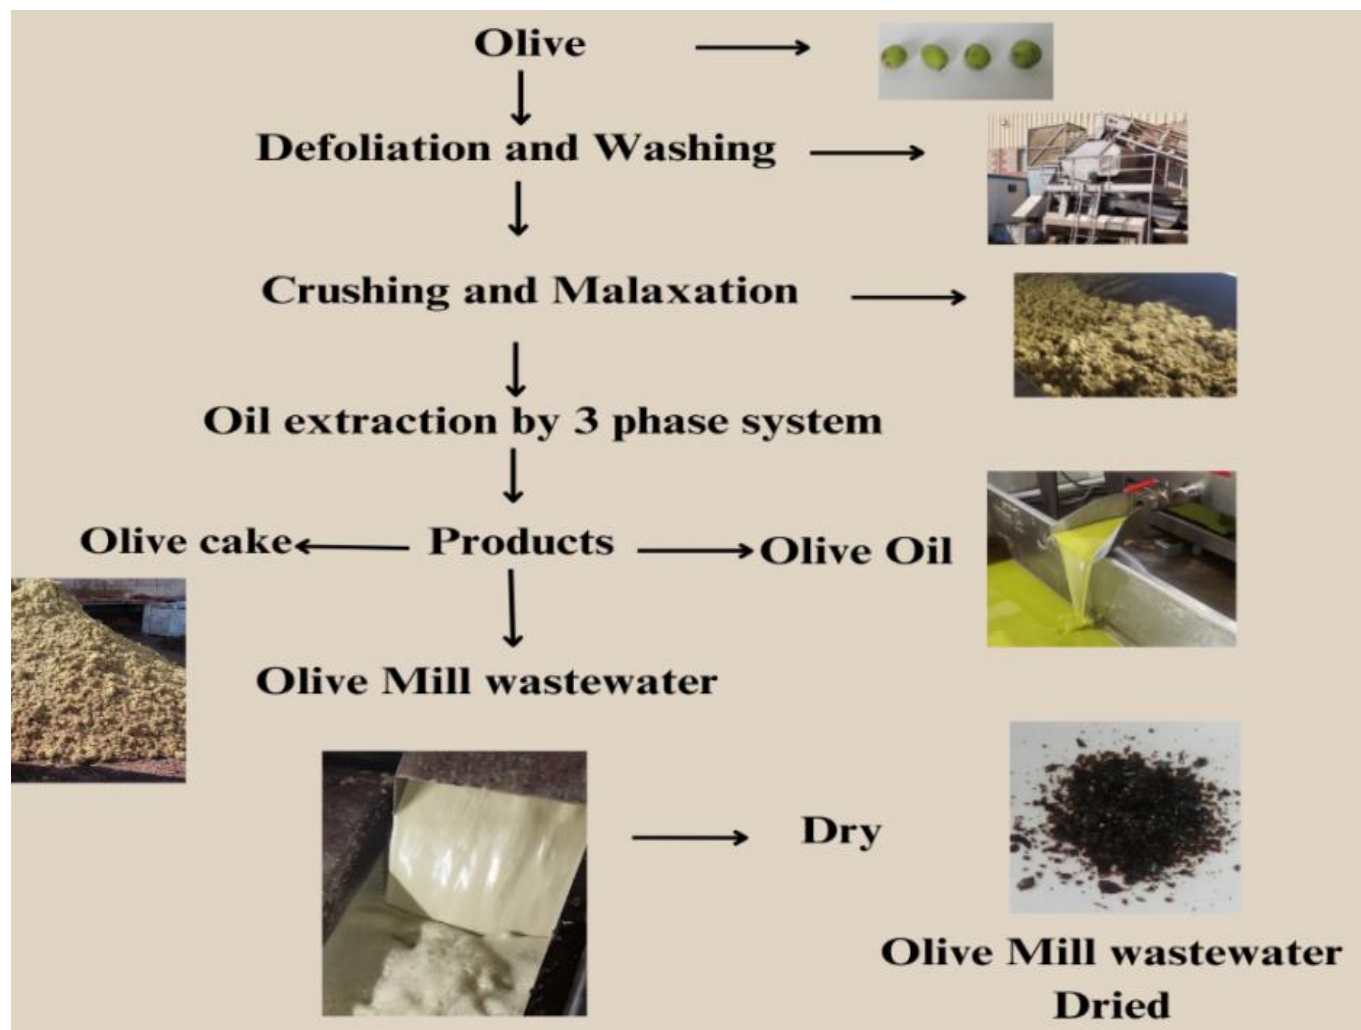

Supplementary Fig. 1 Stages for extracted oil and by-products of olive fruit.

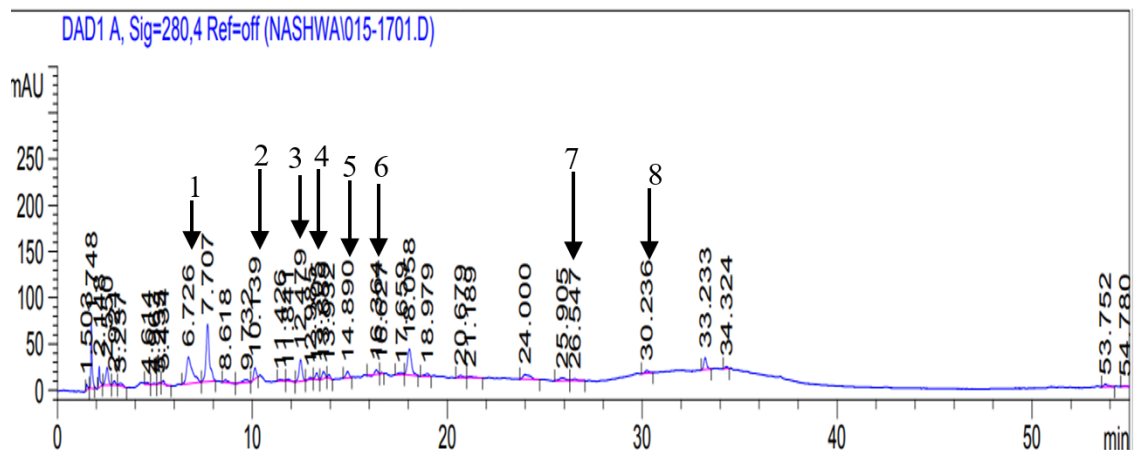

**Supplementary Fig. 2 Polyphenolic composition of olive mill waste water dried by using HPLC.** Protocatechuic acid (1), *p*-hydroxybenzoic acid (2), Chlorogenic acid (3), Caffeic acid (4), Syringic acid (5), Vanillic acid (6), *p*-coumaric acid (7), Oleuropein (8).

**Supplementary Table 1 Polyphenolic composition of olive mill waste water dried by using HPLC**

| Compound                      | Retention time (min) | Concentration (mg/g) |
|-------------------------------|----------------------|----------------------|
| Oleuropein                    | 33.233               | 2.351704             |
| Protocatechuic acid           | 7.707                | 0.65947              |
| <i>p</i> -hydroxybenzoic acid | 10.13                | 0.102071             |
| Chlorogenic acid              | 12.47                | 0.077954             |
| Syringic acid                 | 14.89                | 0.051573             |
| Caffeic acid                  | 13.65                | 0.037550             |
| <i>p</i> -coumaric acid       | 26.5                 | 0.018707             |
| Vanillic acid                 | 16.36                | 0.014242             |

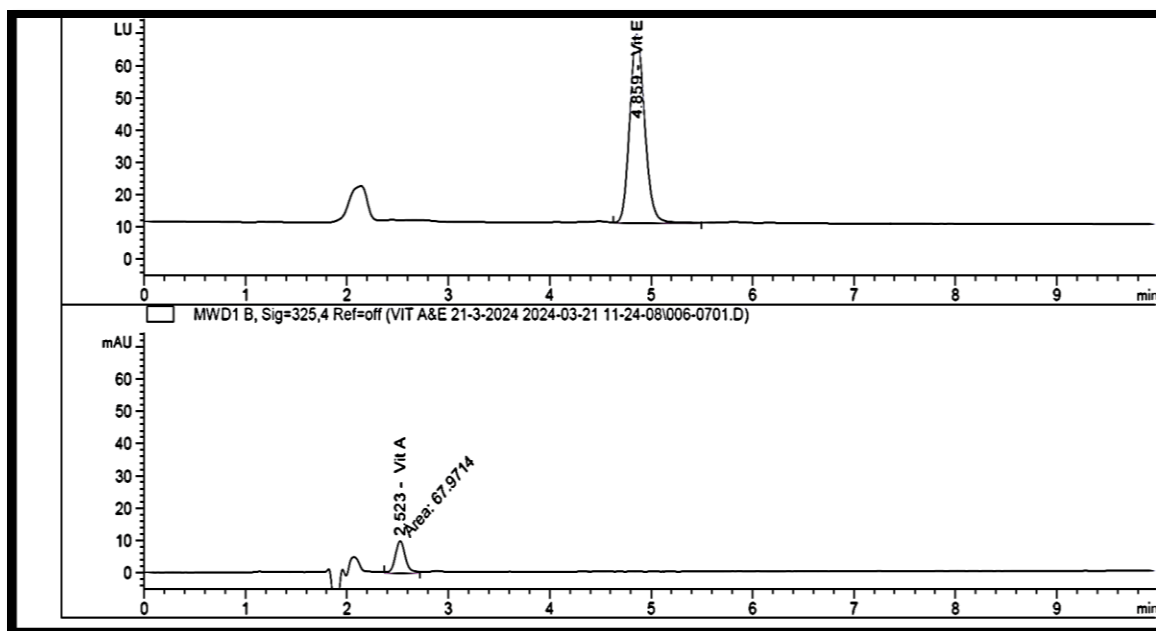

**Supplementary Fig. 3 HPLC chromatograph of tocopherol vitamin (E) and A vitamin.**

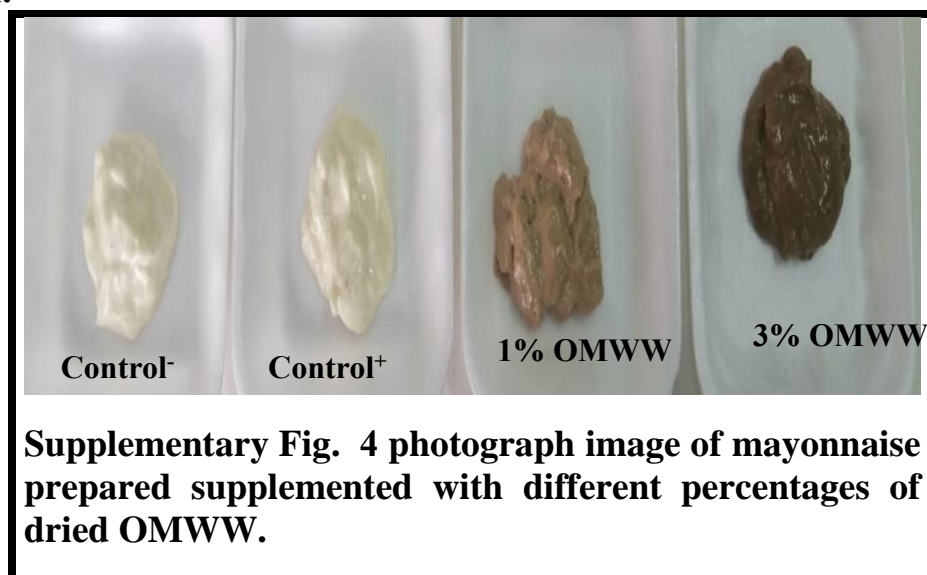

**Supplementary Fig. 4 photograph image of mayonnaise prepared supplemented with different percentages of dried OMWW.**
